# Supplementary material for: Oleic acid based experimental evolution of Bacillus megaterium yielding an enhanced P450 BM3 variant
Source: Research Square preprint supplement (doi:10.21203/rs.3.rs-1347437/v1), 2022-03-15
Supplement: Supplementary file 1 [file 1fd5141adfe69dd95ea649bc.xlsx]

## Sheet: Table 1
			Table 1. Amino acid substitutions accumulated by p450 BM3 DE compared to its parent sequence p450 BM3
			Domains		Mutations
			Heme domain		T1P, V26I, A28T, V127I & A135T
			Linker region		K452Q, P463R, V470E, K473T & A474V
			FMN subdomain		Q546E, L589F, D599E, V624L, D637E & K639A
			FAD subdomain		G660R, T664A, Q674K, T715A, A716T, A741G, A782V, K813E, I824M, E870N & I881V
			NADPH subdomain		E889G, D895G, E947K, E954N, M967V, A1008D & D1019E
