# Supplementary material for: Oleic acid based experimental evolution of Bacillus megaterium yielding an enhanced P450 BM3 variant
Source: Research Square preprint supplement (doi:10.21203/rs.3.rs-1347437/v1), 2022-03-15
Supplement: Supplementary file 2 [file 459168825c179a5e1f90cd7e.xlsx]

## Sheet: Table 3
		Table 3. Kinetic data for pNP production using NADPH as a cofactor for both wild type BM3 and the DE mutant.
				BM3	WT		DE
				kpNP (min-1)	88 ± 13.9		256 ± 8
				kNADPH (min-1)	122 ± 53.4		588 ± 92.4
				Coupling ratio (%)	71.9		43.5
		kpNP and kcofactor are the turnover frequencies for, respectively, the production pNP from the substrate 10-pNCA in the presence of cofactors and the consumption of cofactors in the presence of 10-pNCA at the oxidase domain. Data for the catalytic constants were extracted from the slope of concentration with respect to time, obtained between t = 10 s and 20 s. Data are presented as means ± SD whe…
