# Supplementary material for: Oleic acid based experimental evolution of Bacillus megaterium yielding an enhanced P450 BM3 variant
Source: Research Square preprint supplement (doi:10.21203/rs.3.rs-1347437/v1), 2022-03-15
Supplement: Supplementary file 4 [file 528613e2f15c41cd95384e5e.xlsx]

## Sheet: Table 2
			Table 2. Sequence alignment of new evolved DE mutant compared to members of the CYP102 family
			Organism		p450 Cytochrome		Mutations towards consensus									Mutations leaving consensus
							A28T	V470E	T664A	T715A	A741G	E887G	M967V	A1008D	D1019E	Q546E	K639A	D893G	E947K
			Bacillus megaterium		CYP102A1 WT		A	V	T	T	A	E	M	A	D	Q	K	D	E
					CYP102A1 DE		T	E	A	A	G	G	V	D	E	E	A	G	K
			Bacillus subtilis		CYP102A2		S	Q	A	L	G	R	K	D	A	Q	K	D	D
					CYP102A3		S	A	G	L	D	G	V	D	A	G		D	E
			Bacillus anthracis		CYP102A4		S	E	A	L	D	N	L	D	E	Q	K	N	T
			Bacillus cereus		CYP102A5		S	E	A	L	D	N	L	D	E	Q	K	D	T
			Bradyrhizobium diazoefficiens		CYP102A6		H	R	M	A	G	G	A	D	E	Q	A	D	D
			Bacillus licheniformis		CYP102A7		S	G	A	F	E	G	L	A	I	E	T	D	D
			Bacillus thuringiensis		CYP102A8		S	E	A	L	D	N	L	D	E	Q	K	N	T
			Bacillus weihenstephanensis		CYP102A9		S	E	A	L	D	N	L	D	E	Q	K	N	T
			Streptomyces avermitilis		CYP102D1		Y	Q	L	L	G	T	V	A	K	R	P	D	Q
			Actinosynnema pretiosum		CYP102F1		F	V	A	V	G	S	H	A		H	R	D	E
			Consensus				PUsc, S/T	E	A	Hsc, A/L	G	G	Hsc	D	E	Q	K	D	NCsc
			Secondary consensus								NCsc	Hsc
			Pusc; Polar uncharged side chain, Hsc; Hydrophobic side chain, NCsc; Negatively charged side chain
